# Supplementary material for: Phylogenetics reveals the crustacean order Amphionidacea to be larval shrimps (Decapoda: Caridea)
Source: PubMed Central journal article supplement (PMC4672333; doi:10.1038/srep17464), 2015-12-08
Supplement: srep17464-s1.pdf [file srep17464-s1.pdf]

**Phylogenetics reveals the crustacean order Amphionidacea to be larval shrimps  
(Decapoda: Caridea)**

Sammy De Grave<sup>1</sup>, Tin-Yam Chan<sup>2,3</sup>, Ka Hou Chu<sup>4,5</sup>, Chien-Hui Yang<sup>2,\*</sup> & José M. Landeira<sup>6</sup>

<sup>1</sup> Oxford University Museum of Natural History, Oxford, United Kingdom

<sup>2</sup> Institute of Marine Biology, National Taiwan Ocean University, Keelung 20224, Taiwan

<sup>3</sup> Center of Excellence for the Oceans, National Taiwan Ocean University, Keelung 20224, Taiwan

<sup>4</sup> Simon F.S. Li Marine Science Laboratory, School of Life Sciences, The Chinese University of Hong Kong, Hong Kong, China

<sup>5</sup> Shenzhen Research Institute, The Chinese University Hong Kong, Shenzhen, China

<sup>6</sup> Graduate School of Fisheries Sciences, Hokkaido University, 3-1 Minato, Hakodate, Hokkaido 041-8611, Japan

**Supplementary Figure S1 Full Bayesian phylogram for caridean shrimp taxa and *Amphionides reyaudii*.** Tree based on the concatenated dataset of 16S rRNA and 18S rRNA genes. Bayesian posterior probabilities (Pp) and maximum likelihood bootstrap values (MLb) are represented as percentages above or below the branches. Values <50% are not shown. Representatives of all other infra/suborders within Decapoda were used as outgroups (see Supplementary Table S2), but are not shown.

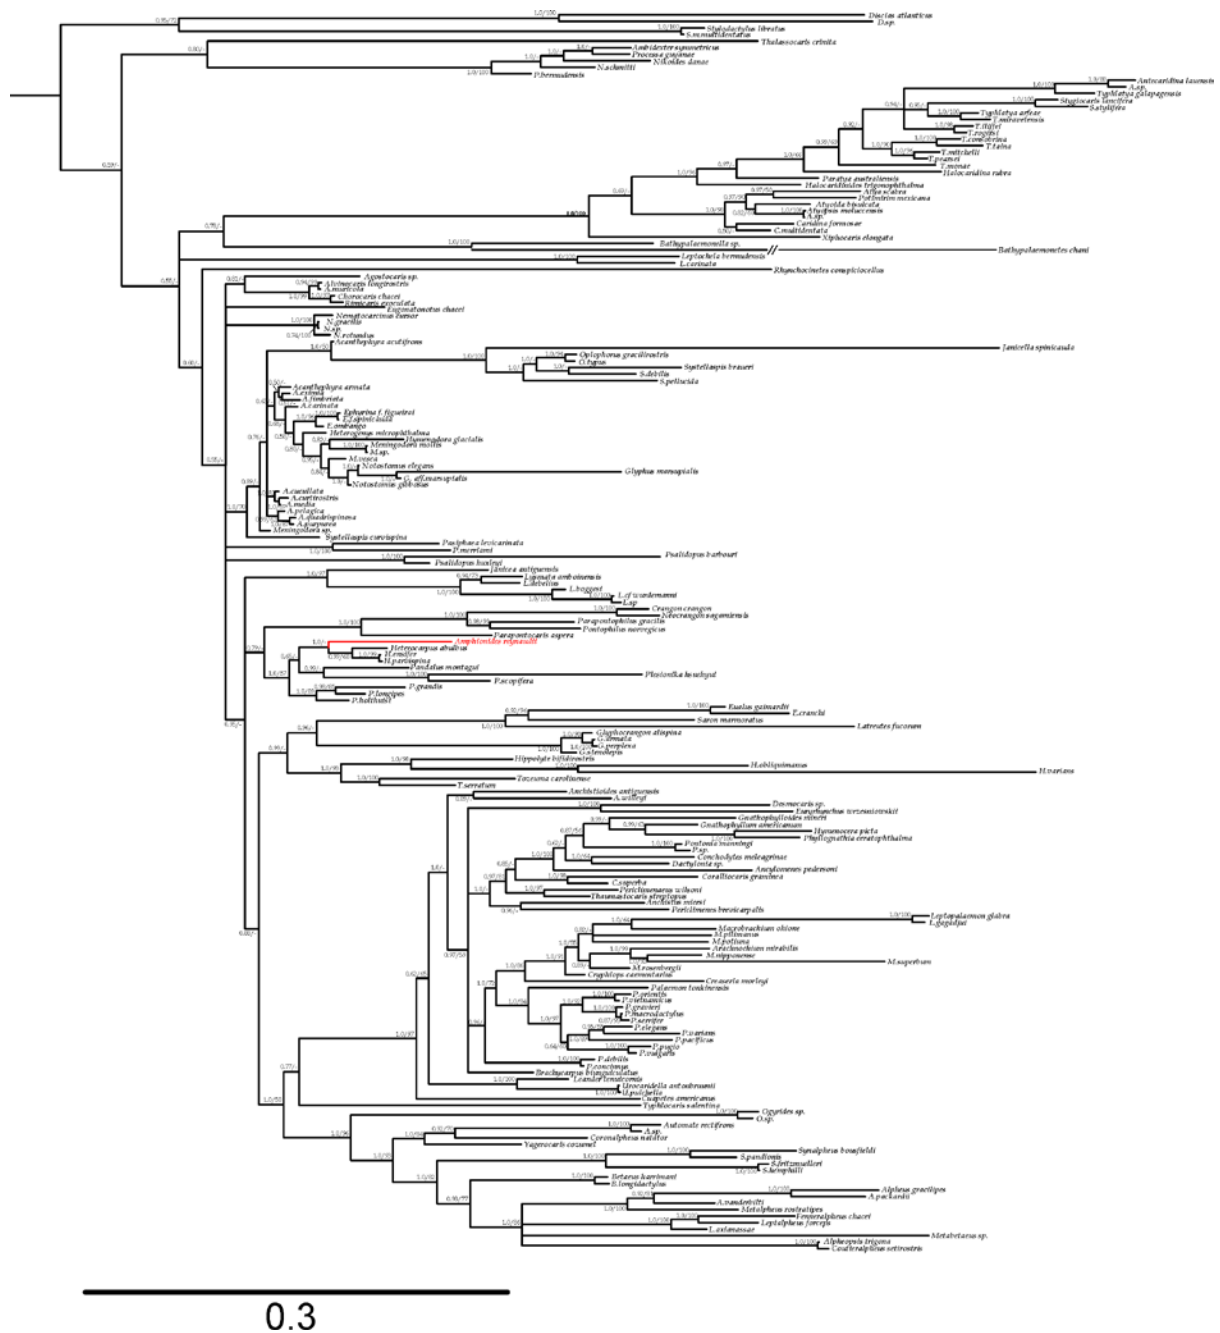

**Supplementary Table S2** Taxa and GenBank accession numbers used in the two-marker analysis. The latest overall classification scheme of Decapoda was followed<sup>35</sup>, with family level systematics within Caridea updated<sup>23,29,36,37</sup>.

| Taxon                                 | GenBank Nos. |          |
|---------------------------------------|--------------|----------|
|                                       | 16S          | 18S      |
| <b>Amphionidacea</b>                  |              |          |
| <i>Amphionides reynaudii</i>          | KT699039     | KT699040 |
| <b>Euphausiacea</b>                   |              |          |
| <i>Euphausia</i> sp.                  | EU868655     | EU868746 |
| <b>Decapod -Dendrobranchiata</b>      |              |          |
| <i>Penaeus semisulcatus</i>           | DQ079731     | DQ079766 |
| <i>Sergia</i> sp.                     | EU868710     | EU868807 |
| <b>Decapoda-Achelata</b>              |              |          |
| <i>Palinurus argus</i>                | AF337966     | AY743955 |
| <b>Decapoda-Anomura</b>               |              |          |
| <i>Pagurus longicarpus</i>            | AF150756     | AF436018 |
| <b>Decapoda-Astacidea</b>             |              |          |
| <i>Enoplometopus occidentalis</i>     | AY583892     | AY583966 |
| <i>Procambarus clarkii</i>            | DQ666844     | AF436001 |
| <b>Decapoda-Axiidea</b>               |              |          |
| <i>Lepidophthalmus louisianensis</i>  | DQ079717     | DQ079751 |
| <b>Decapoda-Brachyura</b>             |              |          |
| <i>Dromia dehaani</i>                 | AY583899     | AY583972 |
| <b>Decapoda-Gebiidea</b>              |              |          |
| <i>Upogebia affinis</i>               | AF436047     | AF436007 |
| <b>Decapoda-Glypheidea</b>            |              |          |
| <i>Laurentaeglyphea neocaledonica</i> | HQ241517     | HQ241528 |
| <b>Decapoda-Polychelida</b>           |              |          |
| <i>Polycheles typhlops</i>            | EU920932     | EU920950 |
| <b>Decapoda-Procarididea</b>          |              |          |
| <i>Procaris ascensionis</i>           | GQ487494     | GQ487502 |
| <i>Procaris mexicana</i>              | EU868715     | EU868811 |
| <b>Decapoda-Stenopodidea</b>          |              |          |
| <i>Stenopus hispidus</i>              | AY583884     | AY743957 |
| <b>Decapoda-Caridea</b>               |              |          |
| ALPHEIDAE                             |              |          |
| <i>Alpheopsis trigona</i>             | EU868633     | EU868723 |
| <i>Alpheus gracilipes</i>             | DQ642885     | DQ642859 |
| <i>Alpheus packardii</i>              | EU868630     | EU868720 |
| <i>Alpheus vanderbilti</i>            | EU868639     | EU868730 |
| <i>Automate rectifrons</i>            | EU868631     | EU868721 |
| <i>Automate</i> sp.                   | EU868635     | EU868725 |
| <i>Betaeus harrimani</i>              | FJ943434     | FJ943440 |
| <i>Betaeus longidactylus</i>          | JX010752     | JF346263 |
| <i>Coronalpheus natator</i>           | EU868636     | EU868727 |
| <i>Coutieralpheus</i> sp.             | EU868637     | EU868728 |
| <i>Fenneralpheus chacei</i>           | EU868638     | EU868729 |
| <i>Leptalpheus axianassae</i>         | EU868671     | EU868764 |
| <i>Leptalpheus forceps</i>            | EU868670     | EU868763 |
| <i>Metabetaeus</i> sp.                | FJ943435     | FJ943441 |
| <i>Metalpheus rostratipes</i>         | KF023115     | JF346264 |
| <i>Synalpheus bousfieldi</i>          | EU868646     | EU868737 |
| <i>Synalpheus fritzmulleri</i>        | EU868642     | EU868733 |

|                                        |          |          |
|----------------------------------------|----------|----------|
| <i>Synalpheus hemphilli</i>            | EU868643 | EU868734 |
| <i>Synalpheus pandionis</i>            | EU868647 | EU868738 |
| <i>Yagerocaris cozumel</i>             | EU868645 | EU868736 |
| BARBOURIIDAE                           |          |          |
| <i>Janicea antiquensis</i>             | KF023112 | JF346262 |
| HIPPOLYTIDAE                           |          |          |
| <i>Hippolyte bifidirostris</i>         | EU920927 | EU920939 |
| <i>Hippolyte obliquimanus</i>          | EU868661 | EU868752 |
| <i>Hippolyte varians</i>               | EU868662 | EU868753 |
| <i>Latreutes fucorum</i>               | EU868664 | EU868755 |
| <i>Saron marmoratus</i>                | KF023102 | JF346244 |
| <i>Tozeuma carolinense</i>             | EU868669 | EU868760 |
| <i>Tozeuma serratum</i>                | EU868668 | EU868759 |
| THORIDAE                               |          |          |
| <i>Eualus gaimardii</i>                | EU920923 | EU920940 |
| <i>Eualus cranchii</i>                 | EU868667 | EU868758 |
| LYSMATIDAE                             |          |          |
| <i>Lysmata boggei</i>                  | DQ079719 | DQ079753 |
| <i>Lysmata debelius</i>                | DQ079718 | DQ079752 |
| <i>Lysmata cf. wurdemanni</i>          | EU868666 | EU868757 |
| <i>Lysmata sp.</i>                     | EU868665 | EU868756 |
| OGYRIDIDAE                             |          |          |
| <i>Ogyrides sp.1</i>                   | EU868679 | EU868772 |
| <i>Ogyrides sp.2</i>                   | EU868680 | EU868773 |
| ATYIDAE                                |          |          |
| <i>Antecaridina lauensis</i>           | EU123851 | HE801016 |
| <i>Antecaridina sp.</i>                | EF173754 | EF173850 |
| <i>Atya scabra</i>                     | EU868632 | EU868722 |
| <i>Atyoida bisulcata</i>               | DQ079704 | DQ079738 |
| <i>Atyopsis moluccensis</i>            | DQ681281 | JF346252 |
| <i>Atyopsis sp.</i>                    | EU868634 | EU868724 |
| <i>Caridina formosae</i>               | DQ478496 | GQ131924 |
| <i>Caridina multidentata</i>           | DQ478505 | JF346236 |
| <i>Halocaridina rubra</i>              | EF173749 | EF173848 |
| <i>Halocaridinides trigonophthalma</i> | EF173752 | EF173849 |
| <i>Paratya australiensis</i>           | EU868640 | EU868731 |
| <i>Potimirim mexicana</i>              | EU868641 | EU868732 |
| <i>Stygiocaris lancifera</i>           | EU123831 | HE801019 |
| <i>Stygiocaris stylifera</i>           | EU123839 | HE801020 |
| <i>Typhlatya arfeae</i>                | HE801000 | HE801025 |
| <i>Typhlatya consobrina</i>            | HE801011 | HE801028 |
| <i>Typhlatya iliffei</i>               | HE800998 | HE801023 |
| <i>Typhlatya galapagensis</i>          | HE800991 | HE801017 |
| <i>Typhlatya miravetensis</i>          | HE800999 | HE801024 |
| <i>Typhlatya mitchelli</i>             | EU868644 | EU868735 |
| <i>Typhlatya monae</i>                 | HE801001 | HE801026 |
| <i>Typhlatya pearsei</i>               | DQ079735 | DQ079770 |
| <i>Typhlatya rogersi</i>               | HE801002 | HE801027 |
| <i>Typhlatya taina</i>                 | HE801005 | HE801029 |
| AGOSTOCARIDIDAE                        |          |          |
| <i>Agostocaris sp.</i>                 | EU868626 | EU868716 |
| ALVINOCARIDIDAE                        |          |          |
| <i>Alvinocaris longirostris</i>        | JQ035659 | JF346247 |
| <i>Alvinocaris muricola</i>            | EU868628 | EU868718 |
| <i>Chorocaris chacei</i>               | AM087922 | AM087653 |
| <i>Rimicaris exoculata</i>             | AM076958 | AM087652 |
| DISCIADIDAE                            |          |          |
| <i>Discias atlanticus</i>              | EU868652 | EU868743 |

|                                      |          |          |
|--------------------------------------|----------|----------|
| <i>Discias</i> sp.                   | EU920921 | EU920941 |
| BATHYPALAEONELLIDAE                  |          |          |
| <i>Bathypalaemonella</i> sp.         | EU868648 | EU868739 |
| <i>Bathypalaemonetes chani</i>       | GQ131910 | GQ131933 |
| CRANGONIDAE                          |          |          |
| <i>Crangon crangon</i>               | EU868649 | EU868740 |
| <i>Neocrangon sagamiensis</i>        | KF023106 | GQ131936 |
| <i>Parapontocaris aspera</i>         | KF023107 | JF346235 |
| <i>Parapontophilus gracilis</i>      | EU868650 | EU868741 |
| <i>Pontophilus norvegicus</i>        | GQ487496 | GQ487504 |
| GLYPHOCRANGONIDAE                    |          |          |
| <i>Glyphocrangon alispina</i>        | EU868656 | EU868747 |
| <i>Glyphocrangon armata</i>          | HQ241513 | HQ241525 |
| <i>Glyphocrangon perplexa</i>        | KF023104 | JF346255 |
| <i>Glyphocrangon stenolepis</i>      | KF023103 | JF346241 |
| EUGONATONOTIDAE                      |          |          |
| <i>Eugonatonotus chacei</i>          | EU868653 | EU868744 |
| NEMATOCARCINIDAE                     |          |          |
| <i>Nematocarcinus cursor</i>         | EU868673 | EU868766 |
| <i>Nematocarcinus gracilis</i>       | KP075927 | KP075825 |
| <i>Nematocarcinus rotundus</i>       | EU868672 | EU868765 |
| <i>Nematocarcinus</i> sp.            | GQ131895 | GQ131919 |
| RHYNCHOCINETIDAE                     |          |          |
| <i>Rhynchocinetes conspicioellus</i> | GQ131914 | JF346243 |
| XIPHOCARIDIDAE                       |          |          |
| <i>Xiphocaris elongata</i>           | EU868714 | EU868809 |
| OPOPHORIDAE                          |          |          |
| <i>AcanthePHYRA acutifrons</i>       | KP075878 | KP075829 |
| <i>AcanthePHYRA armata</i>           | KP075894 | KP075786 |
| <i>AcanthePHYRA carinata</i>         | KP075896 | KP075798 |
| <i>AcanthePHYRA cucullata</i>        | KP075893 | KP075809 |
| <i>AcanthePHYRA curtirostris</i>     | EU868676 | EU868769 |
| <i>AcanthePHYRA eximia</i>           | KP075897 | KP075823 |
| <i>AcanthePHYRA fimbriata</i>        | KP075895 | KP075788 |
| <i>AcanthePHYRA media</i>            | KP075892 | KP075805 |
| <i>AcanthePHYRA pelagica</i>         | KP075881 | KP075808 |
| <i>AcanthePHYRA purpurea</i>         | EU868677 | EU868770 |
| <i>AcanthePHYRA quadrispinosa</i>    | KP075886 | KP075821 |
| <i>Ephyrina figueirai</i>            | AM076960 | AM087654 |
| <i>Ephyrina figueirai spinicauda</i> | KP075911 | KP075800 |
| <i>Ephyrina ombango</i>              | KP075915 | KP075810 |
| <i>Heterogenys microphthalmia</i>    | KP075898 | KP075787 |
| <i>Hymenodora glacialis</i>          | KP075908 | KP075828 |
| <i>Janicella spinicauda</i>          | KP075933 | KP075858 |
| <i>Meningodora mollis</i>            | KP075910 | KP075783 |
| <i>Meningodora vesca</i>             | KP075907 | KP075791 |
| <i>Meningodora</i> sp.1              | EU868678 | EU868771 |
| <i>Meningodora</i> sp.2              | GQ131890 | GQ131931 |
| <i>Notostomus elegans</i>            | KP075901 | KP075797 |
| <i>Notostomus gibbosus</i>           | KP075905 | GQ131917 |
| <i>Oplophorus gracilirostris</i>     | KP075922 | KP075848 |
| <i>Oplophorus typus</i>              | KP075923 | KP075835 |
| <i>Systellaspis braueri</i>          | KP075926 | KP075853 |
| <i>Systellaspis curvispina</i>       | KP075916 | KP075784 |
| <i>Systellaspis debilis</i>          | EU868682 | EU868775 |
| <i>Systellaspis pellucida</i>        | KP075925 | KP075857 |
| ANCHISTIOIDIDAE                      |          |          |
| <i>Anchistioides antiguensis</i>     | EU868629 | EU868719 |

|                                     |          |          |
|-------------------------------------|----------|----------|
| <i>Anchistoides willeyi</i>         | DQ642883 | DQ642857 |
| DESMOCARIDIDAE                      |          |          |
| <i>Desmocarid sp.</i>               | EU868651 | EU868742 |
| EURYRHYNCHIDAE                      |          |          |
| <i>Euryrhynchus wrzesniowski</i>    | EU868654 | EU868745 |
| PALAEONIDAE                         |          |          |
| <i>Anchistus miersi</i>             | DQ642877 | DQ642851 |
| <i>Ancylomenes pedersoni</i>        | KM071741 | AY743954 |
| <i>Arachnochium mirabilis</i>       | KC515033 | KC515052 |
| <i>Brachycarpus biunguiculatus</i>  | EU868686 | EU868778 |
| <i>Conchodytes meleagrinae</i>      | KC515051 | EF540837 |
| <i>Coralliocaris graminea</i>       | KF738361 | AM083319 |
| <i>Coralliocaris superba</i>        | DQ642880 | DQ642854 |
| <i>Creaseria morleyi</i>            | DQ079710 | DQ079746 |
| <i>Cuapetes americanus</i>          | EU868701 | EU868795 |
| <i>Cryphiops caementarius</i>       | DQ079711 | DQ079747 |
| <i>Dactylonia sp.</i>               | DQ642876 | DQ642850 |
| <i>Gnathophylloides mineri</i>      | EU868659 | EU868750 |
| <i>Gnathophyllum americanum</i>     | EU868660 | EU868751 |
| <i>Hymenocera picta</i>             | EU868663 | EU868754 |
| <i>Leander tenuicornis</i>          | EU868690 | EU868783 |
| <i>Leptopalaemon gagadju</i>        | EU868693 | EU868787 |
| <i>Leptopalaemon glabra</i>         | EF588318 | EU249463 |
| <i>Macrobrachium nipponense</i>     | HQ830201 | DQ531769 |
| <i>Macrobrachium ohione</i>         | EU868694 | EU868788 |
| <i>Macrobrachium pilimanus</i>      | GQ487497 | GQ487505 |
| <i>Macrobrachium potiuna</i>        | DQ079721 | DQ079756 |
| <i>Macrobrachium rosenbergii</i>    | GQ131903 | GQ131934 |
| <i>Macrobrachium superbum</i>       | KC515041 | KC515055 |
| <i>Palaemon concinnus</i>           | KC515043 | KC515056 |
| <i>Palaemon debilis</i>             | KC515044 | KC515057 |
| <i>Palaemon elegans</i>             | EU868696 | EU868790 |
| <i>Palaemon gravieri</i>            | KC515045 | KC515058 |
| <i>Palaemon macrodactylus</i>       | DQ642875 | DQ642849 |
| <i>Palaemon pacificus</i>           | KC515046 | KC515059 |
| <i>Palaemon serrifer</i>            | KC515048 | KC515060 |
| <i>Palaemon orientis</i>            | KC515036 | KC515053 |
| <i>Palaemon pugio</i>               | EU868697 | EU868791 |
| <i>Palaemon tonkinensis</i>         | EU920920 | EU920937 |
| <i>Palaemon varians</i>             | JQ042301 | KC763180 |
| <i>Palaemon vietnamicus</i>         | KC515037 | KC515054 |
| <i>Palaemon vulgaris</i>            | JQ042300 | AY743941 |
| <i>Periclimenaeus wilsoni</i>       | EU868702 | EU868797 |
| <i>Periclimenes brevicarpalis</i>   | DQ642879 | DQ642853 |
| <i>Phyllognathia ceratophthalma</i> | DQ642873 | DQ642847 |
| <i>Pontonia manningi</i>            | EU868705 | EU868800 |
| <i>Pontonia sp.</i>                 | EU868706 | EU868801 |
| <i>Thaumastocaris streptopus</i>    | DQ642878 | DQ642852 |
| <i>Urocaridella antonbruunii</i>    | KC515049 | KC515061 |
| <i>Urocaridella pulchella</i>       | KC515050 | KC515062 |
| TYPHLOCARIDIDAE                     |          |          |
| <i>Typhlocaris salentina</i>        | EU868713 | EU868808 |
| PANDALIDAE                          |          |          |
| <i>Heterocarpus abulbus</i>         | KF023186 | JF346257 |
| <i>Heterocarpus ensifer</i>         | KP075930 | KP075776 |
| <i>Heterocarpus parvispina</i>      | HQ241514 | HQ241526 |
| <i>Pandalus montagui</i>            | GQ487498 | GQ487506 |
| <i>Plesionika grandis</i>           | KF023113 | JF346258 |

|                                                  |          |          |
|--------------------------------------------------|----------|----------|
| <i>Plesionika holthuisi</i>                      | EU868703 | EU868798 |
| <i>Plesionika hsuehyui</i>                       | AM076968 | AM083322 |
| <i>Plesionika longipes</i>                       | EU868704 | EU868799 |
| <i>Plesionika scopifera</i>                      | HQ241519 | HQ241530 |
| THALASSOCARIDIDAE                                |          |          |
| <i>Thalassocaris crinita</i>                     | EU868712 | EU868810 |
| PASIPHAEIDAE                                     |          |          |
| <i>Glyphus marsupialis</i>                       | KP075861 | KP075775 |
| <i>Glyphus</i> aff. <i>marsupialis</i>           | KP075902 | KP075772 |
| <i>Leptochela bermudensis</i>                    | EU868691 | EU868785 |
| <i>Leptochela carinata</i>                       | EU868692 | EU868786 |
| <i>Pasiphaea levicarinata</i>                    | GQ131899 | GQ131921 |
| <i>Pasiphaea merriami</i>                        | EU868700 | EU868796 |
| PROCESSIDAE                                      |          |          |
| <i>Ambidexter symmetricus</i>                    | EU868683 | EU868776 |
| <i>Nikoides danae</i>                            | FJ943436 | FJ943442 |
| <i>Nikoides schmitti</i>                         | EU868695 | EU868789 |
| <i>Processa bermudensis</i>                      | GQ487499 | GQ487507 |
| <i>Processa guyanae</i>                          | EU868708 | EU868803 |
| PSALIDOPODIDAE                                   |          |          |
| <i>Psalidopus barbouri</i>                       | EU868709 | EU868804 |
| <i>Psalidopus huxleyi</i>                        | GQ131898 | GQ131923 |
| STYLODACTYLIDAE                                  |          |          |
| <i>Stylodactylus libratus</i>                    | AM076943 | AM083323 |
| <i>Stylodactylus multidentatus multidentatus</i> | EU868711 | EU868806 |
